# Supplementary material
Source: PubMed Central journal article supplement (PMC514653)
Supplement: pnas_101_34_12422__1.pdf [file pnas_101_34_12422__1.pdf]

## **Supporting Text**

### **Emissions Scenarios**

The Intergovernmental Panel on Climate Change's latest suite of emission scenarios, known as SRES (Special Report on Emissions Scenarios) (1), describe internally consistent pathways of future greenhouse gas emissions. SRES scenarios cover a wide range of alternative futures based on projections of economic growth, technology, energy intensity, and population. The SRES scenarios are not assigned probabilities, but rather can be viewed as possible futures, with the actual path depending on technology, economic development, and political will. The B1 and A1fi scenarios used in this study bracket the range of SRES scenarios, and they can be thought of as lower and higher bounds that encompass most, but not all, potential nonintervention emissions futures. Both scenarios follow similar demographic trends, with global population peaking in midcentury and then declining. Both also involve rapid technological development. At the higher end, however, economic growth and globalization lead to increases in energy use and industrial production, with much of the technological development being focused on fossil energy sources. This causes A1fi CO<sub>2</sub> emissions to climb throughout the century, reaching almost 30 Gt/year or six times 1990 levels by 2100 (2). Emissions under the B1 scenario are lower, based on a world that transitions relatively rapidly to service and information economies and that emphasizes the development of clean, nonfossil technology. CO<sub>2</sub> emissions in the B1 scenario peak at just below 10 Gt/year, around two times 1990 levels, at mid-century and decline slowly to below current-day levels. For comparison with mid-range business-as-usual projections used by previous studies (3-6), the temperature and precipitation projections provided here (Figs. 4 and 5) also include those corresponding to the mid-range A2 and B2 scenarios. Emissions and hence temperature projections for these scenarios fall between those of A1fi and B1, but underlying assumptions are very different. A2 describes a very heterogeneous world where economic development is regionally oriented and economic growth and technological change are relatively slow, whereas in B2 the emphasis is on local solutions to economic, social, and environmental sustainability with less rapid and more diverse technological change.

### **Precipitation**

Projections of change in precipitation over California from the higher, lower, and two mid-range scenarios for both models tend to decrease, with most end-of-century projections falling between 0 and -1 mm/day. The full range varies between a net increase of +0.25 mm/day (PCM B1) to a decrease of -1 mm/day (HadCM3 A1fi) (Figs. 5 and 6). In general, precipitation appears to be dominated by interdecadal variability rather than long-term trends (Fig. 5). However, both models and scenarios do exhibit a consistent continental-scale pattern of increased precipitation along the upper Pacific

coast, with little change, generally a drying, over California by the end of the century (Fig. 11). In terms of extreme precipitation, the number of very wet days, indicated by nonexceedance probabilities of 95% at selected stations across California, decreases by 2–5% or 7–18 days per year (Fig. 7). Analysis of heavy rainfall events lasting 1, 4, and 7 days show a slight decrease in frequency over northern California and little change in southern California for HadCM3 projections (Fig. 8). In contrast, PCM projections suggest a possible increase in heavy precipitation events, particularly for the wetter B1 scenario, for shorter 24-hr events, and for southern California. Overall, changes in precipitation exceedance probabilities and heavy precipitation event frequencies show little significant trend, a result consistent with the lack of observed historical trend over the past century (7). Extreme dry periods are not projected to change significantly in either length or duration (Figs. 9 and 10). However, there is some indication that events on the order of a few weeks may become more frequent in the future, particularly for northern California (approximately one to two additional events per year for 2-week dry periods).

### **Extreme Heat**

A measure of the projected change in maximum temperature extremes (8) is given by the shift in the 50% (mean maximum daily temperature) and the 95% (5% highest mean maximum daily temperatures for each 30-year period or roughly 18 days/year with temperatures exceeding this amount) nonexceedance values. The maximum daily temperature ( $T_x$ ) exceedance probabilities at Shasta Dam, Los Angeles, Sacramento, and Fresno for emission scenarios A1fi and B1 using PCM and HadCM3 projections are shown in Fig. 12. The end-of-century change in 50% and 95%  $T_x$  exceedance probabilities for Shasta Dam are each greater than 7°C for the HadCM3 A1fi scenario and 6°C for the PCM A1fi scenario. Fresno also has shifts in  $T_x$  exceedance greater than 6°C for both scenarios. The 1961-1990 baseline 95% exceedance becomes the 70% and 75% exceedance values for HadCM3 and PCM A1fi, and 82% and 84% exceedance values for B1. Such shifts indicate that Fresno's historic 5% warmest days may occur as frequently as 25–30% of the year for A1fi and 16–18% for B1 by the end of this century. Other inland sites follow this increase in the number of warm days.

Exceedance probabilities can also be used to measure the number of days on which temperatures exceed a standardized threshold of 32°C (Fig. 12). By the end of the century (2070-2099), Los Angeles is projected to see such temperatures on as many as 110 days/year under the A1fi scenario, with a 33- to 44-day difference between emissions scenarios, a dramatic increase over the 22 days/year experienced during the reference period. Other locations are projected to experience less dramatic but substantial increases in extreme heat frequency.

Extreme heat can also be represented by changes in the length of the heatwave season and the number of days classified as heatwave conditions (here defined as 3 or more consecutive days with temperatures exceeding 32°C). The lengthening of future heat wave seasons is primarily due to earlier onset, with the season beginning 25-40 days earlier under B1, and twice that (50-80 days earlier) under the A1fi scenario (Fig. 14). Increases in the number of heatwave days under the B1 scenario are similar across most locations, ranging from 27-58 days/year (Fig. 13). Under A1fi, 49-83 more heatwave days are seen, which represents an increase of ~20-30 more days than under the B1 scenario. Proportionally greater increases are seen for Los Angeles, which currently experiences the lowest occurrence of heatwave days per year (12, as opposed to 60-160 for other locations).

### **Heat-Related Mortality**

The mortality estimates derived for the B1 and A1fi 2090 scenarios were developed for the Los Angeles metropolitan area by using procedures that determine threshold meteorological conditions beyond which mortality tends to increase. Meteorologically “oppressive” conditions are determined by identifying maximum *apparent temperature* thresholds that have been historically associated with rising heat-related mortality. Apparent temperature is a combination of the impacts of temperature, relative humidity, and windspeed on the human body, and it can be considered an adequate surrogate to evaluate heat transfer effects on humans (9). Relating daily human mortality to daily maximum apparent temperature values, a threshold apparent temperature value was determined for Los Angeles of 34°C. When reached or exceeded, this daily apparent temperature threshold yields a mean mortality value that is statistically significantly higher than the long-term mean at a 0.05 level of significance.

An algorithm was developed for all days with maximum apparent temperatures at or above 34°C to determine the environmental factors most responsible for explaining the variability in mortality during oppressive weather. Both meteorological (maximum and minimum apparent temperature and dewpoint, cloud cover, and others) and nonmeteorological (consecutive days of oppressive weather and time of season when oppressive weather occurs) variables are potential dependent variables within this algorithm, which can be used to estimate daily heat-related mortality. The final algorithm ( $P < 0.001$ ) is:

$$Mort_p = -8.481 + 0.326AT + 1.891CD - 0.012TS,$$

where estimated daily mortality ( $Mort_p$ ) is given as a function of maximum apparent daily temperature ( $AT$ ), the day’s position in a consecutive sequence of days with maximum apparent temperature equal to or exceeding 34°C ( $CD$ ), and days after May 1 ( $TS$ ).

The impact of acclimatization was determined by using a procedure that we deem superior to the previously common “analog city” approach (10). The new acclimatization procedure assumes that people will most likely respond to heat under climate change conditions as they do today during the very hottest summers. Thus, instead of choosing analog cities, which possess different demographics and urban structure than the target city, we have selected “analog summers” in the target city that best duplicate the summers as expressed in the climate change scenarios. For Los Angeles, the five hottest summers over the past 24 years were selected based on mean summer apparent temperature values. A new algorithm was developed for days during the hottest summers that equaled or exceeded the apparent temperature threshold of 34°C. The algorithm is:

$$Mort_p = -4.774 + 0.178AT + 1.928CD - 0.013TS.$$

As expected, the new algorithm for the hottest summers shows a decreased sensitivity to the heat because of intraseasonal acclimatization (this is apparent in the lower coefficient for the *AT* variable). By using the new algorithm, revised mortality totals were derived. Under acclimatization, mortality totals averaged on the order of 15–20% lower than those yielded by the original algorithm (see Table 1). This is our best estimate for acclimatized mortality in Los Angeles under the two given climate change scenarios.

### **Impact of Decreasing Snowpack on California’s Ski Industry**

Projections of decreases in Sierra snowpack (Fig. 15) have the potential to substantially affect California’s ski industry. Most of California’s 34 ski resorts are based between 2,000–2,500 m with a vertical rise of ~800–1,200 m. For these elevations, we use a conservative estimate of a 50 mm minimum SWE threshold to define the beginning of the ski season. This lower bound corresponds to 200–500 mm or only 1–2 ft of snow depth under typical snow densities (11). This value is taken as the range of minimum snow required for ski slope operation for some resorts, although a higher range of 2–4 ft may be a more accurate average for California ski resorts in general (B. Roberts, California Ski Industry Association, personal communication).

For the reference period 1961-1990, the beginning of the snow season tends to fall during the last week of November, and it lasts until late June. Under all scenarios, the ski season is found to shorten, with the majority of the change being an earlier melt date. However, the delay in the start of the ski season is sufficient to suggest likely impacts on the economic vitality of the ski industry, as there is a general reliance for successful operations on snow cover in ski areas by mid December (B. Roberts, California Ski Industry Association, personal communication). For PCM simulations, by the end of the century the start of the ski season is delayed by 22 (B1) to 29 (A1fi) days and is 49–103 days shorter. Under the HadCM3, similar delays occur by mid-century, and by the end of

the century, the ski season begins 36 days later under B1, while the 50-mm threshold is never crossed under the A1fi scenario (Fig. 15).

Costs of adaptation may include increased reliance on snowmaking and/or relocating or terminating operations. Relocation options may be limited, however, as many of the ski resorts in Oregon and Washington State are located at lower elevations than those in California. Mid-range PCM estimates show snowpack reductions of 63% for the Cascades and 40% for the entire Columbia River Basin, on the same order as reductions seen in California under similar projections (13), suggesting a net loss rather than shift in ski-related tourist income throughout the region.

### **Sea-Level Rise**

Sea levels along the California coast are projected to continue to rise over the next century. Future rates of increase range from  $\approx 10\text{--}43$  cm/100 years for B1 to  $\approx 18\text{--}64$  cm/100 years for A1fi (Fig. 16), compared to the historical 17 cm/100 years rate of mean global sea-level rise (2). Higher sea levels would threaten many elements of California's social, economic, freshwater, and ecological systems (14). El Niño has produced some of the highest sea levels and winter storms with the highest coastal waves (15) observed in several decades of records along the California coast. The combination of such events with heightened mean sea level and increased diurnal tidal ranges (16) would expose the coast to severe flooding and erosion, damage to coastal structures and real estate, and salinity intrusion of vulnerable coastal aquifers. The San Francisco Bay and Delta are particularly vulnerable to rising sea levels, which may cause flooding of leveed islands, real estate, and wetlands as well as greater salt water intrusion into the North Bay and Delta. This would impact currently protected ecosystems as well as the fresh water supply in that region (17, 18).

### **Impacts on Water Supply**

The ultimate impacts of climate change on water availability, timing, and supply for California are as much a function of the behavioral response of individuals and organizations as of hydrology. If snowmelt is used for storage, there is the potential for very little impact on supply, although with greatly reduced storage the risk of water shortages during dry years would increase. If used primarily for supply, reductions in available water from river sources could be almost as large as the projected decreases in April snowpack, which are greatest under the A1fi scenario.

Additional storage could be developed at some cost whether in the form of above-ground storage or aquifer-based conjunctive use. Without additional storage, even with higher runoff during some winter months it appears unlikely that the extra runoff could effectively be captured and retained for use after April 1 without reducing the amount of

flood storage space left in reserve on April 1. Besides flood storage in April, the amount of water that can be delivered from storage during the summer irrigation season is determined by the amount of water that needs to be left in storage at the end of the summer for carryover to protect against the possibility of drought in the following years. Both the need to leave empty storage for flood protection on April 1 and the need for carryover storage at the end of the summer reflect uncertainty about future weather conditions and risk aversion on the part of reservoir operators. To the extent that there might be an increase in the future variability of precipitation and streamflow, we would expect to see a greater need for precaution in reservoir management.

Changes in water availability and timing have important implications for water supply and management (19). The existing pattern of seniority in water rights could be disrupted by reducing the value of rights to mid- and late-season natural streamflow and boosting the value of rights to stored water. The degree to which users would be affected depends on how private surface water rights and contractual arrangements within the two major California water projects adapt to substantial changes in natural flow conditions. Senior users without access to storage, including many riparians and holders of water rights that predate the major projects, could face unprecedented shortages due to reduced summertime streamflow. Seventy-five percent of total water use currently occurs between April and September when lawns are being watered and crops are being grown. With existing weak controls on groundwater pumping, a probable response is increased groundwater pumping that could exacerbate existing overdraft in the San Joaquin Valley.

California identifies five types of water years, ranging from wet to critical, based on the amount of unimpaired runoff in the Sacramento and San Joaquin River systems. Table 2 shows the distribution of water year types for the Sacramento River system (the 40-30-30 Four River Index) over the historical period 1906-1999 together with the projected distribution of year types over the period 2070-2099 under alternative climate change scenarios. In the historical period, 31% of the years were dry or critical. Under PCM B1, the proportion of years projected to be dry or critical at the end of the century falls to about 8%, but under the other three scenarios (PCM A1fi, HadCM3 A1fi and B1) it rises to 50–64%. For the three drier scenarios, the frequency of the driest year on record over the last century increases 10-fold to approximately one time per decade by the end of the century.

Under the drier scenarios, the length, severity and frequency of extreme droughts, defined as occurring only once over the past hundred years for the Sacramento River system, could more than double with equal or greater water loss. The Sacramento River runoff averaged 22.1 km<sup>3</sup>/year over the historical period and the lowest annual runoff recorded was 6.3 km<sup>3</sup>/year in 1976. Over the period 2070-2099, 2 years are projected to have lower annual runoff than this under HadCM3 B1, and 3 years are projected to have lower annual runoff under PCM A1fi and HadCM3 A1fi, the lowest being a runoff of 4.4

km<sup>3</sup>/year projected under HadCM3 A1fi. In the historical period, the worst 2-year drought occurred in 1976–1977 when the Sacramento River runoff averaged 8.1 km<sup>3</sup>/year; other major droughts were 1929–1934, when the runoff averaged 12.1 km<sup>3</sup>/year, and 1987–1992, when it averaged 12.3 km<sup>3</sup>/year. Over the period 2070–2098, PCM A1fi projects a 4-year drought where the runoff averages 9.9 km<sup>3</sup>/year and two 3-year droughts where it averages 7.2 and 11.8 km<sup>3</sup>/year, respectively. HadCM3 A1fi projects a 14-year drought where the runoff averages 10.7 km<sup>3</sup>/year, and HadCM3 B1 projects a 3-year drought where the runoff averages 8.5 km<sup>3</sup>/year.

These estimates are likely to understate the severity of any future droughts or water shortages as they do not account for changes in climate variability (for example, there is some indication of increases in the frequency of dry periods on the order of 2 weeks; see “Precipitation” above). Despite population growth for the past 15-20 years, water withdrawals over the United States and California have been fairly constant as water use efficiency has increased (20). However, population growth in California is expected to double or even triple from its current population of 34 million by the end of the century (5), which is likely to increase water demand but is not accounted for in estimates of water impacts here.

### **Temperature Impacts on Agriculture**

Increases in average and extreme temperatures due to climate change are likely to produce adverse effects on quantity and quality for a number of California’s agricultural products, including dairy products and wine grapes. Milk production begins to decline at temperatures greater than 25°C (21), and Holsteins, the predominant breed in California, have demonstrated a 1.15 kg decline in daily milk production per degree over 32°C (22). Dairy production is currently concentrated in the south Central Valley, with 67% of 2002 dairy value originating in only five counties [Tulare, Merced, Stanislaus, San Bernardino, and Kings (23)]. High-end estimates of production loss over 25°C, which are probably more reflective of the temperature ranges found in California, show the largest production decline in the highest-producing counties for both HadCM3 scenarios, whereas PCM predicts a loss throughout California (Table 3). For the low-end estimates ( $T > 32^{\circ}\text{C}$ ), milk production is moderately reduced in both HadCM3 scenarios and negligible for both PCM scenarios. Statewide, production losses for the 25°C threshold range from –7 to –10% for the B1 scenario, but almost double to –11 to –22% for the A1fi scenario. Interscenario differences are even more pronounced for the 32°C threshold, where losses for B1 are minimal, at ~0.5–2.5% while A1fi shows losses of 2–8% of production value (Table 3). Potential adaptations include using shade and sprinklers to reduce heat stress (24), measures that can be cost-effective under some conditions but become less so with increasing temperature and humidity (25).

For most wine grape varieties, the average temperature should fall between 15°C and 21°C in the final month of ripening to produce high-quality wines; average monthly temperature exceeding 24°C nearly always reduce quality for most table wines, through the combined effects of heat and moisture stress (12). Under all simulations, the timing of grape harvest based on accumulated degree-days above 10°C beginning in April is expected to be an average of 1–2 months earlier in 2070–2099 relative to the reference period. This produces a shift from optimal to marginal and marginal to quality-impaired ripening temperatures across major grape-growing regions. By mid-century, all simulations show a slight shift to the warmer end of the optimal range in currently optimal grape-growing zones in the Wine Country (Sonoma and Napa Counties) and Cool Coastal (Monterey and Mendocino Counties) areas. By the end of the century, all simulations show a shift from optimal to marginal or impaired conditions in the Wine Country and the Central Coast (San Luis Obispo and Monterey Counties; see Table 3). All scenarios also show a shift from current marginal to impaired conditions for the Central Valley grape-growing regions by mid-century and beyond. By 2070–2099, even under the lower B1 scenario all regions become either marginal or impaired with the exception of the Cool Coastal region. Under the A1fi scenario, the majority of locations are impaired, suggesting significant economic impacts of modeled temperature increases for grape-growing regions throughout California.

### **Changes in Vegetation Distribution**

Changes in vegetation distribution across California occur under all scenarios, as initial decreases in some vegetation types and increases in others that are first visible in 2020–2049 almost double by 2070–2099 (Fig. 17). Temperature-induced declines in Alpine/Subalpine forest (with almost total disappearance under HadCM3 A1fi) and major shifts from evergreen conifer forest to mixed evergreen conifer forest are fairly robust across models, increasing in magnitude from the B1 to A1fi scenarios. Under all simulations, wildfire plays a role in converting shrubland and woodland to grassland. Decreases in effective moisture shift the competitive balance in favor of the more drought-tolerant grasses, and increases in grass biomass provide more fine fuels that support more frequent fires. Increased fire favors grasses, which re-establish more rapidly than slower growing woody lifeforms after burning. The increase in grassland is much larger for the PCM than for the HadCM3 scenarios, highlighting the complexity of the fire-mediated changes driven not only by changes in the structure and loading of fuels with changes in effective moisture, but also by changes in temperature and humidity as they affect fuel moisture. The effect of the latter is also evident along the southern coast where increases in fuel moisture with increased humidity result in less fire and the consequent expansion of forest under the PCM scenarios. Declines in effective moisture under the warmer and drier HadCM3 scenarios reduce the productivity of both grass and woody lifeforms in the southern Central Valley, resulting in a significant expansion of desert. Under the PCM scenarios, more moderate declines in effective moisture trigger a



fire-mediated shift from desert scrub to arid grassland in this region of the state. The only areas to experience little change are the north part of the Central Valley, which remains grassland under all scenarios, and the Southeast, which remains desert.

1. Nakićenović, N., Alcamo, J., Davis, G., de Vries, B., Fenhann, J., Gaffin, S., Gregory, K., Grübler, A., Jung, T. Y., Kram, T., *et al.* (2000) *Intergovernmental Panel on Climate Change Special Report on Emissions Scenarios* (Cambridge Univ. Press, Cambridge, U.K.).
2. Houghton, J. T., Ding, Y., Griggs, D. J., Noguer, M., van der Linden, P. J. & Xiaosu D., (2001) *Climate Change 2001: The Scientific Basis. Contribution of Working Group I to the Third Assessment Report of the Intergovernmental Panel on Climate Change* (Cambridge Univ. Press, Cambridge, U.K.).
3. Field, C. B., Daily, G. C., Davis, F. W., Gaines, S., Matson, P. A., Melack, J. & Miller, N. L. (1999) *Confronting Climate Change in California: Ecological Impacts on the Golden State* (Union of Concerned Scientists, Cambridge, MA, and Ecological Society of America, Washington, DC)
4. Wilkinson, R., Clarke, K., Goodchild, M., Reichman, J. & Dozier, J. (2002) *The Potential Consequences of Climate Variability and Change for California: The California Regional Assessment* (U.S. Global Change Research Program, Washington, DC).
5. Wilson, T., Williams, L., Smith, J. & Medelsohn, R. (2003) *Global Climate Change and California: Potential Implications for Ecosystems, Health, and the Economy*, Publication No. 500-03-058CF (California Energy Commission, Public Interest Energy Research Environmental Area, Sacramento, CA).
6. Leung, L. R., Qian, Y., Bian, X., Washington, W. M., Han, J. & Roads, J. O. (2004). *Clim. Change* **62**, 75-113.
7. Kunkel, K. E. (2003) *Natural Hazards* **29** (2), 291-305.
8. Miller, N. L., Bashford, K. E., & Strem, E. (2003) *J. Am. Water Resour. Assoc.* **39**, 771-784.
9. Watts, J. D. & Kalkstein, L. S. (2004) *J. Appl. Met.* **43** (3), 503-513.
10. Kalkstein, L. S. & Greene, J. S. (1997) *Environ. Health Perspect.* **105** (1), 84-93.
11. Gray, D. M. & Male, D. H., eds. (1981) *Handbook of Snow* (Pergamon, New York).

12. Gladstones, J. (1992) *Viticulture and Environment* (Winetitles, Underdale, South Australia).
13. Payne, J. T., Wood, A. W., Hamlet, A. F., Palmer, R. N. & Lettenmaier, D. P. (2004) *Clim. Change* **62**, 233-256.
14. Scavia, D., Field, J. C., Boesch, D. F., Buddemeier, R. W., Burkett, V., Cayan, D. R., Fogarty, M., Harwell, M. A., Howarth, R. W., Mason, C., *et al.* (2002) *Estuaries* **25** (20), 149-164.
15. Bromirski, P. D., Flick, R. E. & Cayan, D. R. (2003) *J. Clim.* **16** (6), 982-993.
16. Flick, R. E., Murray, J. F. & Ewing, L. C. (2003) *J. Waterway Port Coastal Ocean Eng.* **129** (4), 155-164.
17. Knowles, N. & Cayan, D. R. (2004) *Clim. Change* **62**, 319-336.
18. Knowles, N. (2002) *Water Resour. Res.* **38**, Art. 1289.
19. Gleick, P. H. & Chalecki, E. L. (1999) *J. Am. Water Resour. Assoc.* **35**, 1429-1441.
20. Hutson, S. S., Barber, N. L., Kenny, J. F., Linsey, K. S., Lumia, D. S. & Maupin, M. A. (accessed May 2004) *Estimated Use of Water in the United States in 2000* (U.S. Geological Survey Circular 1268, <http://water.usgs.gov/pubs/circ/2004/circ1268/>).
21. Mellado, M. (1995) *Veterinaria* **26**, 389-399.
22. Ahmed, M. M. M. & El Amin, A. I. (1997) *J. Arid Environ.* **35**, 737-745.
23. California Agricultural Statistics Service (2002) *California Agriculture Statistical Review* (California Agricultural Statistics Service, Sacramento, CA).
24. Jones, R. N. & Hennessy, K. J. (2000) *Climate Change Impacts in the Hunter Valley: A Risk Assessment of Heat Stress Affecting Dairy Cattle* (Commonwealth Scientific and Industrial Research Organization Atmospheric Research, Aspendale, Victoria, Australia).
25. Pittock, B., Wratt, D., Basher, R., Bates, B., Finlayson, M., Gitay, H., Woodward, A., Arthington, A., Beets, P., Biggs, B., *et al.* (2001) *Climate Change 2001: Impacts, Adaptation, and Vulnerability* (Cambridge Univ. Press, Cambridge, U.K.).
